# Supplementary material for: The quest for a unified view of bacterial land colonization
Source: PubMed Central journal article supplement — ISME J. 2014 Jan 23;8(7):1358–69. doi: 10.1038/ismej.2013.247 (PMC4069389; doi:10.1038/ismej.2013.247), 2014-01-23
Supplement: ismej2013247x5.pdf [file ismej2013247x5.pdf]

Table S1 Presence/absence of DnaE2 in terrestrial vs. aquatic environment.

| Bacteria                                          | Phylum               | Habitat | DnaE2 | Gene# | HGT# | HGT%  | Environmental Metadata from GOLD                                                                 |
|---------------------------------------------------|----------------------|---------|-------|-------|------|-------|--------------------------------------------------------------------------------------------------|
| <i>Chitinophaga_pinensis</i> _DSM_2588            | Bacteroidetes        | ■       | +     | 7396  | 2534 | 34.26 | Pine litter in Australia                                                                         |
| <i>Dyadobacter_fermentans</i> _DSM_18053          | Bacteroidetes        | ■       | +     | 5854  | 1558 | 26.61 | Host, Soil                                                                                       |
| <i>Niastella_koreensis</i> _GR20-10               | Bacteroidetes        | ■       | +     | 7444  | 2494 | 33.5  | Soil cultivated with Korean ginseng; Yeongju region of Korea                                     |
| <i>Pedobacter_heparinus</i> _DSM_2366             | Bacteroidetes        | ■       | +     | 4339  | 652  | 15.03 | Soil                                                                                             |
| <i>Aequorivita_sublithincola</i> _DSM_14238       | Bacteroidetes        | ■       | -     | 3242  | 2515 | 77.58 | Sea water from Vestfold Hills Antarctica                                                         |
| <i>Donghaeana_dokdonensis</i> _DSW-6              | Bacteroidetes        | ■       | -     |       |      |       | Sea water sampled in Dokdo                                                                       |
| <i>Echinicola_vietnamensis</i> _DSM_17526         | Bacteroidetes        | ■       | -     | 4684  | 897  | 19.15 | Seawater collected in a musselfarm; Vietnam, South China Sea, Nha Trang Bay                      |
| <i>Owenweeksia_hongkongensis</i> _DSM_17368       | Bacteroidetes        | ■       | -     |       |      |       | Sea water (sand filtered); China, Hong Kong                                                      |
| <i>Psychroflexus_torquis</i> _ATCC_700755         | Bacteroidetes        | ■       | -     |       |      |       | Prydz Bay, Antarctica from a sea-ice algal assemblage                                            |
| <i>Rhodothermus_marinus</i> _DSM_4252             | Bacteroidetes        | ■       | -     | 2965  | 169  | 5.7   | Marine, Hot spring, Aquatic                                                                      |
| <i>Deinococcus_deserti</i> _VCD115                | Deinococcus-Thermus  | ■       | +     | 3511  | 911  | 25.95 | Sahara Desert in Morocco and Tunisia                                                             |
| <i>Deinococcus_ficus</i>                          | Deinococcus-Thermus  | ■       | +     |       |      |       | Rhizosphere of <i>Ficus religiosa</i>                                                            |
| <i>Deinococcus_peraridilitoris</i> _DSM_19664     | Deinococcus-Thermus  | ■       | +     | 4466  | 2703 | 60.52 | Arid soil collected from a coastal desert north of Antofagasta in Chile                          |
| <i>Deinococcus_geothermalis</i> _DSM_11300        | Deinococcus-Thermus  | ■       | -     | 3148  | 1524 | 48.41 | Hot spring at Agnano in Naples Italy                                                             |
| <i>Marinithermus_hydrothermalis</i> _DSM_14884    | Deinococcus-Thermus  | ■       | -     | 2310  | 278  | 12.03 | Deep-sea hydrothermal vent chimney sample collected from the Suiyo Seamount                      |
| <i>Oceanithermus_profundus</i> _DSM_14977         | Deinococcus-Thermus  | ■       | -     | 2445  | 387  | 15.83 | Deep-sea hot vent; 13N, East Pacific Rise                                                        |
| <i>Thermus_thermophilus</i> _HB8                  | Deinococcus-Thermus  | ■       | -     | 2302  | 35   | 1.52  | Thermal vent in Japan                                                                            |
| <i>Truepera_radiovictrix</i> _DSM_17093           | Deinococcus-Thermus  | ■       | -     | 3046  | 1845 | 60.57 | Water sample from a hot spring runoffs on the Island of Sao Miguel in the Azores, Portugal       |
| <i>Acidiphilium_cryptum</i> _JF-5                 | Proteobacteria-Alpha | ■ ■     | +     | 3701  | 269  | 7.27  | Coal mine lake sediment                                                                          |
| <i>Bradyrhizobium_sp._S23321</i>                  | Proteobacteria-Alpha | ■       | +     |       |      |       | Paddy field soil at the experimental farm of Tohoku University                                   |
| <i>Brucella_microti</i> _CCM_4915                 | Proteobacteria-Alpha | ■       | +     | 3346  | 2    | 0.06  | Host, Soil                                                                                       |
| <i>Hirschia_baltica</i> _ATCC_49814               | Proteobacteria-Alpha | ■       | +     | 3266  | 1166 | 35.7  | Brackish water                                                                                   |
| <i>Jannaschia_sp._CCS1</i>                        | Proteobacteria-Alpha | ■       | +     | 4339  | 556  | 12.81 | isolated from Pacific coastal seawater, Bodega Head, CA                                          |
| <i>Maricaulis_maris</i> _MCS10                    | Proteobacteria-Alpha | ■       | +     | 3138  | 821  | 26.16 | Puget Sound in Washington                                                                        |
| <i>Mesorhizobium_ciceri</i> _WSM1271              | Proteobacteria-Alpha | ■       | +     | 6531  | 39   | 0.6   | Root nodules of the pasture legume <i>Biserrula pelecinus</i> growing in the Mediterranean basin |
| <i>Novosphingobium_aromaticivorans</i> _DSM_12444 | Proteobacteria-Alpha | ■ ■     | +     | 4038  | 651  | 16.12 | Fresh water, Host, Soil, Aquatic                                                                 |
| <i>Parvibaculum_lavamentivorans</i> _DS-1         | Proteobacteria-Alpha | ■ ■     | +     | 3714  | 1593 | 42.89 | Sludge, Host                                                                                     |
| <i>Rhizobium_etli</i> _CFN_42                     | Proteobacteria-Alpha | ■       | +     | 6109  | 126  | 2.06  | Host, Plant root, Root nodule                                                                    |

|                                         |                      |   |   |      |      |       |                                                                                       |
|-----------------------------------------|----------------------|---|---|------|------|-------|---------------------------------------------------------------------------------------|
| Rhizobium_leguminosarum_WSM1325         | Proteobacteria-Alpha | ■ | + | 7292 | 132  | 1.81  | Host, Plant root, Root nodule, Soil                                                   |
| Rhodobacter_sphaeroides_KD131           | Proteobacteria-Alpha | ■ | + | 4635 | 191  | 4.12  | Sea mud off the coast of DaeBu Island, South Korea                                    |
| Rhodopseudomonas_palustris_HaA2         | Proteobacteria-Alpha | ■ | + | 4788 | 206  | 4.3   | Fresh water, Soil, Aquatic                                                            |
| Sphingobium_sp._SYK-6                   | Proteobacteria-Alpha | ■ | + |      |      |       | Soil                                                                                  |
| Sphingomonas_wittichii_RW1              | Proteobacteria-Alpha | ■ | + | 5463 | 1877 | 34.36 | Elbe River, downstream Hamburg harbour                                                |
| Starkeya_novella_DSM_506                | Proteobacteria-Alpha | ■ | + | 4563 | 649  | 14.22 | Soil                                                                                  |
| alpha_proteobacterium_HIMB5             | Proteobacteria-Alpha | ■ | - |      |      |       | Seawater of Kaneohe Bay, Oahu, Hawaii                                                 |
| Candidatus_Endolissoclinum_patella_L2   | Proteobacteria-Alpha | ■ | - |      |      |       | Coral reef, Host, Marine                                                              |
| Candidatus_Pelagibacter_sp._IMCC9063    | Proteobacteria-Alpha | ■ | - |      |      |       | Seawater sample collected off the coastal region near the Dasan Korean Arctic Station |
| Candidatus_Pelagibacter_ubique_HTCC1062 | Proteobacteria-Alpha | ■ | - | 1394 | 39   | 2.8   | Aquatic, Marine                                                                       |
| Magnetococcus_sp._MC-1                  | Proteobacteria-Alpha | ■ | - | 3823 | 505  | 13.21 | Water from the Pettaquamscutt Estuary in Rhode Island                                 |
| Parvularcula_bermudensis_HTCC_2503      | Proteobacteria-Alpha | ■ | - | 2733 | 369  | 13.5  | Seawater collected from the Bermuda Atlantic Time Series station in the Sargasso Sea  |
| Rhodospirillum_rubrum_ATCC_11170        | Proteobacteria-Alpha | ■ | - | 3933 | 1633 | 41.52 | Fresh water                                                                           |
| Alicyclophilus_denitrificans_K601       | Proteobacteria-Beta  | ■ | + | 4898 | 148  | 3.02  | Anaerobic sewage sludge                                                               |
| Aromatoleum_aromaticum_EbN1             | Proteobacteria-Beta  | ■ | + | 4686 | 1652 | 35.25 | Isolated from sediment contaminated with ethylbenzene                                 |
| Burkholderia_cenocepacia_MC0-3          | Proteobacteria-Beta  | ■ | + | 7169 | 62   | 0.86  | Soil associated with maize roots                                                      |
| Collimonas_fungivorans_Ter331           | Proteobacteria-Beta  | ■ | + | 4493 | 569  | 12.66 | Soil                                                                                  |
| Comamonas_testosteroni_CNB-1            | Proteobacteria-Beta  | ■ | + |      |      |       | activated sludge from a chemical plant                                                |
| Cupriavidus_necator_N-1                 | Proteobacteria-Beta  | ■ | + | 7915 | 365  | 4.61  | Soil, University Park, PA                                                             |
| Cupriavidus_taiwanensis_LMG_19424       | Proteobacteria-Beta  | ■ | + |      |      |       | Root nodule of the legume Mimosa pudica in Ping-Tung Taiwan, China                    |
| Delftia_sp._Cs1-4                       | Proteobacteria-Beta  | ■ | + | 6028 | 225  | 3.73  | PAH contaminated soils in Wisconsin                                                   |
| Herbaspirillum_seropedicae_SmR1         | Proteobacteria-Beta  | ■ | + | 4799 | 737  | 15.36 | Roots of rice plants                                                                  |
| Leptothrix_cholodnii_SP-6               | Proteobacteria-Beta  | ■ | + | 4420 | 638  | 14.43 | Fresh water, Soil, Aquatic                                                            |
| Methylbium_petroleiphilum_PM1           | Proteobacteria-Beta  | ■ | + | 4601 | 754  | 16.39 | Fresh water, Fresh water, Sludge, Host, Aquatic                                       |
| Pusillimonas_sp._T7-7                   | Proteobacteria-Beta  | ■ | + | 3826 | 584  | 15.26 | benthal mud of petroleum-contaminated site in Bohai Sea, China                        |
| Ralstonia_pickettii_12D                 | Proteobacteria-Beta  | ■ | + | 5518 | 284  | 5.15  | Copper-contaminated sediment from a lake in Michigan                                  |
| Ramlibacter_tataouinensis_TTB310        | Proteobacteria-Beta  | ■ | + | 3926 | 468  | 11.92 | Sand particles buried in a sandy soil of a semi-arid region of South Tunisia          |
| Rhodoferax_ferrireducens_T118           | Proteobacteria-Beta  | ■ | + | 4561 | 917  | 20.11 | Aquifer sediment collected at a depth of 18 feet                                      |
| Thiomonas_arsenitoxydans_3As            | Proteobacteria-Beta  | ■ | + |      |      |       | acid mine drainage                                                                    |
| Variovorax_paradoxus_S110               | Proteobacteria-Beta  | ■ | + | 6450 | 587  | 9.1   | Soil                                                                                  |

|                                              |                      |     |   |      |      |       |                                                                                   |
|----------------------------------------------|----------------------|-----|---|------|------|-------|-----------------------------------------------------------------------------------|
| <i>Chromobacterium_violaceum</i> _ATCC_12472 | Proteobacteria-Beta  | ■   | - | 4550 | 1921 | 42.22 | Freshwater                                                                        |
| <i>Methylobacillus_flagellatus</i> _KT       | Proteobacteria-Beta  | ■ ■ | - | 2824 | 681  | 24.11 | Sludge, Host, Wastewater                                                          |
| <i>Methylotenera_mobilis</i> _JLW8           | Proteobacteria-Beta  | ■ ■ | - | 2400 | 383  | 15.96 | Fresh water, Aquatic, Sediment                                                    |
| <i>Methylotenera_versatilis</i> _301         | Proteobacteria-Beta  | ■ ■ | - | 2858 | 678  | 23.72 | Fresh water, Aquatic, Sediment                                                    |
| <i>Nitrosomonas_eutropha</i> _C91            | Proteobacteria-Beta  | ■   | - | 2695 | 545  | 20.22 | Fresh water, Host                                                                 |
| <i>Nitrosomonas_sp._Is79A3</i>               | Proteobacteria-Beta  | ■   | - | 3597 | 28   | 0.78  | Aquatic, Fresh water                                                              |
| <i>Polynucleobacter_necessarius</i> _STIR1   | Proteobacteria-Beta  | ■   | - | 1782 | 1    | 0.06  | Endosymbiont, Fresh water, Fresh water, Host                                      |
| <i>Sideroxydans_lithotrophicus</i> _ES-1     | Proteobacteria-Beta  | ■   | - | 3049 | 1324 | 43.42 | Fresh water                                                                       |
| <i>Anaeromyxobacter_sp._Fw109-5</i>          | Proteobacteria-Delta | ■   | + | 4549 | 727  | 15.98 | Subsurface sediments (ca 15 m) at the ERSP-FRC, Oak Ridge, TN.                    |
| <i>Bdellovibrio_bacteriovorus</i> _HD100     | Proteobacteria-Delta | ■   | + | 3636 | 2635 | 72.47 | Soil                                                                              |
| <i>Corallococcus_coralloides</i> _DSM_2259   | Proteobacteria-Delta | ■   | + |      |      |       | Soil                                                                              |
| <i>Haliangium_ochraceum</i> _DSM_14365       | Proteobacteria-Delta | ■   | + | 6952 | 2760 | 39.7  | Coastal sands from Miura Peninsula, Japan                                         |
| <i>Myxococcus_xanthus</i> _DK_1622           | Proteobacteria-Delta | ■   | + | 7454 | 609  | 8.17  | Terrestrial, Soil                                                                 |
| <i>Sorangium_cellulosum</i> _So_ce_56        | Proteobacteria-Delta | ■   | + | 9700 | 3621 | 37.33 | Soil, Terrestrial                                                                 |
| <i>Stigmatella_aurantiaca</i> _DW4_/3-1      | Proteobacteria-Delta | ■   | + | 8407 | 155  | 1.84  | Commonly isolated from wood and bark                                              |
| <i>Bacteriovorax_marinus</i> _SJ             | Proteobacteria-Delta | ■   | - | 3291 | 1928 | 58.58 | Water sample from Saint John's Island in the Caribbean                            |
| <i>Desulfohalobium_retbaense</i> _DSM_5692   | Proteobacteria-Delta | ■   | - | 2612 | 664  | 25.42 | Retba Lake in Senegal Africa                                                      |
| <i>Desulfotalea_psychrophila</i> _LSv54      | Proteobacteria-Delta | ■ ■ | - | 3332 | 1437 | 43.13 | Marine sediments off of the coast of Svalbard                                     |
| <i>Hippea_maritima</i> _DSM_10411            | Proteobacteria-Delta | ■   | - | 1780 | 1034 | 58.09 | Papua New Guinea, Matupi Harbour                                                  |
| <i>Alcanivorax_dieselolei</i> _B5            | Proteobacteria-Gamma | ■   | + | 4470 | 1580 | 35.35 | Oil-contaminated sea water                                                        |
| <i>Ferrimonas_balearica</i> _DSM_9799        | Proteobacteria-Gamma | ■ ■ | + | 3947 | 829  | 21    | Surface sediment in harbor of Palma de Mallorca, Spain                            |
| <i>Marinobacter_aquaeolei</i> _VT8           | Proteobacteria-Gamma | ■   | + | 4342 | 601  | 13.84 | Offshore oil platform                                                             |
| <i>Pseudomonas_aeruginosa</i> _LESB58        | Proteobacteria-Gamma | ■ ■ | + | 6026 | 162  | 2.69  | Fresh water, Host, Soil                                                           |
| <i>Pseudomonas_putida</i> _GB-1              | Proteobacteria-Gamma | ■ ■ | + | 5515 | 238  | 4.32  | Fresh water, Host, Soil, Aquatic                                                  |
| <i>Shewanella_loihica</i> _PV-4              | Proteobacteria-Gamma | ■ ■ | + | 4010 | 225  | 5.61  | Iron-rich mat; hydrothermal vent; on the south rift of Loihi, Hawaii              |
| <i>Shewanella_piezotolerans</i>              | Proteobacteria-Gamma | ■ ■ | + | 5047 | 420  | 8.32  | Sediment; under 1,914 m of water depth collected in the west Pacific Ocean        |
| <i>Simiduia_agarivorans</i> _SA1             | Proteobacteria-Gamma | ■   | + | 3836 | 251  | 6.54  | Seawater of coastal region of Keelung, Taiwan                                     |
| <i>Thioflavicoccus_mobilis</i> _8321         | Proteobacteria-Gamma | ■   | + | 3786 | 660  | 17.43 | Flat, laminated microbial mat in a salt marsh near Woods Hole, Massachusetts, USA |
| <i>Alcanivorax_borkumensis</i> _SK2          | Proteobacteria-Gamma | ■ ■ | - | 2817 | 265  | 9.41  | Seawater sediment sample in the Isle of Borkum, North Sea                         |
| <i>Candidatus_Ruthia_magnifica</i> _Cm       | Proteobacteria-Gamma | ■   | - | 1118 | 43   | 3.85  | Host, Hydrothermal vent, Marine                                                   |

|                                       |                      |     |   |      |      |       |                                                                                         |
|---------------------------------------|----------------------|-----|---|------|------|-------|-----------------------------------------------------------------------------------------|
| Halomonas_elongata_DSM_2581           | Proteobacteria-Gamma | ■   | - | 3556 | 743  | 20.89 | Fresh water                                                                             |
| Kangiella_koreensis_DSM_16069         | Proteobacteria-Gamma | ■ ■ | - | 2694 | 1833 | 68.04 | Sea water of tidal flat sediment in the Daepo Beach, of the Yellow Sea in South Korea   |
| Marinomonas_posidonica_IVIA-Po-181    | Proteobacteria-Gamma | ■   | - | 3651 | 351  | 9.61  | Marine                                                                                  |
| Pseudoalteromonas_haloplanktis_TAC125 | Proteobacteria-Gamma | ■   | - | 3634 | 263  | 7.24  | Coastal sea water near a French Antarctic station, Adelia Land                          |
| Psychromonas_ingrahamii_37            | Proteobacteria-Gamma | ■   | - | 3877 | 1194 | 30.8  | Arctic polar sea ice; USA, Alaska, Point Barrow, Elson Lagoon                           |
| Serratia_sp._WW4                      | Proteobacteria-Gamma | ■   | - |      |      |       | Waste water of paper machine                                                            |
| Shewanella_baltica_BA175              | Proteobacteria-Gamma | ■   | - |      |      |       | Seawater from the Gotland Deep, Baltic Sea                                              |
| Shewanella_denitrificans_OS217        | Proteobacteria-Gamma | ■   | - | 3914 | 446  | 11.39 | Gotland Deep an anoxic basin in the central Baltic Sea in 1986 from a depth of 120-130m |
| Shewanella_halifaxensis_HAW-EB4       | Proteobacteria-Gamma | ■ ■ | - | 4462 | 203  | 4.55  | Marine, Sediment                                                                        |
| Shewanella_sediminis_HAW-EB3          | Proteobacteria-Gamma | ■ ■ | - | 4666 | 346  | 7.42  | Marine, Sediment                                                                        |

### Note:

■ aquatic environment; ■ terrestrial environment; ■ ■ bacteria can live in both aquatic and terrestrial environments or boundary zones like marine sediment and ditch mud; + presence of DnaE2; - absence of DnaE2; the environmental metadata and HGT% are collected from Genomes Online Database (GOLD; <http://www.genomesonline.org/>). It is indicated in this table that presence of DnaE2 is associated with terrestrial environment whereas absence of DnaE2 is correlated with aquatic environment except for 7 bacteria (in grey background) and these correlations are independent of taxonomy.
