# Supplementary material for: The quest for a unified view of bacterial land colonization
Source: PubMed Central journal article supplement — ISME J. 2014 Jan 23;8(7):1358–69. doi: 10.1038/ismej.2013.247 (PMC4069389; doi:10.1038/ismej.2013.247), 2014-01-23
Supplement: ismej2013247x6.pdf [file ismej2013247x6.pdf]

Table S2. Relative abundance of DnaE2 in the Peru Margin sediment of different depths.

| <b>Depth</b> | <b>GC%</b> | <b>DnaE1+DnaE3</b> | <b>DnaE2</b> | <b>PolC</b> | <b>DnaE2%</b>       | <b>Average DnaE2%</b> |
|--------------|------------|--------------------|--------------|-------------|---------------------|-----------------------|
| 5m           | 48±10%     | 10                 | 5            | 3           | 50.00               | 42.39%                |
| 30m          | 48±10%     | 46                 | 16           | 5           | 34.78               |                       |
| 50m          | 55±11%     | 8                  | 8            | 1           | 100.00              | 84.52%                |
| 70m          | 52±10%     | 6                  | 8            | 9           | 100.00 <sup>a</sup> |                       |
| 91m          | 53±10%     | 7                  | 5            | 5           | 71.43               |                       |
| 159m         | 54±10%     | 15                 | 10           | 6           | 66.67               |                       |

**Note:** <sup>a</sup>There are more DnaE2 sequences identified than DnaE1+DnaE3 at this depth due to biased sample size and we manually set DnaE2% to 100%.
