# Supplementary material for: The quest for a unified view of bacterial land colonization
Source: PubMed Central journal article supplement — ISME J. 2014 Jan 23;8(7):1358–69. doi: 10.1038/ismej.2013.247 (PMC4069389; doi:10.1038/ismej.2013.247), 2014-01-23
Supplement: ismej2013247x7.pdf [file ismej2013247x7.pdf]

Table S3. Relative abundances of three known repair genes in different metagenomic datasets.

| <b>Samples</b>       | <b>Sample size<sup>a</sup></b> | <b>MutT(198aa)<sup>b</sup></b> | <b>MutM(260aa)</b> | <b>MutY(202aa)</b> |
|----------------------|--------------------------------|--------------------------------|--------------------|--------------------|
| North Pacific Ocean  | 3 785 773                      | 3476(0.092%) <sup>c</sup>      | 784(0.021%)        | 1462(0.039%)       |
| Sargasso sea         | 1 001 987                      | 808(0.081%)                    | 516(0.051%)        | 614(0.061%)        |
| Freshwater           | 2 546 538                      | 492(0.019%)                    | 249(0.0098%)       | 395(0.016%)        |
| Peru Margin sediment | 237 680                        | 52 (0.022%)                    | 32(0.013%)         | 27(0.011%)         |
| Minnesota Farm       | 184 374                        | 94(0.051%)                     | 48(0.026%)         | 44(0.024%)         |
| FACE                 | 13 881 342                     | 1707(0.012%)                   | 2057(0.015%)       | 1676(0.012%)       |

**Note:** <sup>a</sup>Sample size stands for the total number of assembled peptides in each dataset;

<sup>b</sup>Number in parentheses indicates the average protein length encoded by each repair gene;

<sup>c</sup>The integer indicates number of peptide classified for each repair gene; the decimal in parentheses, which can be used as a measure of the relative abundance of each repair gene in each dataset, is calculated by corresponding number of protein dividing the total sample size.
